# Supplementary material for: A Novel Fluorescent Sensor Based on Aptamer and qPCR for Determination of Glyphosate in Tap Water
Source: MDPI journal article supplement (doi:10.3390/s23020649), 2023-01-06
Supplement: s1 [file s1]

# Supporting Information

## A Novel Fluorescent Sensor Based on Aptamer and qPCR for Determination of Glyphosate in Tap Water

Yong Shao <sup>1,2,†</sup>, Run Tian <sup>1,2,†</sup>, Jiaqi Duan <sup>3</sup>, Miao Wang <sup>1,2,\*</sup>, Jing Cao <sup>1,2</sup>, Zhen Cao <sup>1,2</sup>, Guangyue Li <sup>3</sup>, Fen Jin <sup>1,2</sup>, A. M. Abd El-Aty <sup>4,5,6</sup> and Yongxin She <sup>1,2,\*</sup>

<sup>1</sup> Institute of Quality Standardization & Testing Technology for Agro-Products, Chinese Academy of Agricultural Sciences, Beijing 100193, China

<sup>2</sup> Key Laboratory of Agrofood Safety and Quality (Beijing), Ministry of Agriculture and Rural Areas, Beijing 100081, China

<sup>3</sup> State Key Laboratory for Biology of Plant Diseases and Insect Pests, Institute of Plant Protection, Chinese Academy of Agricultural Sciences, Beijing 100193, China

<sup>4</sup> State Key Laboratory of Biobased Material and Green Papermaking, Shandong Academy of Sciences, Qilu University of Technology, Jinan 250353, China

<sup>5</sup> Department of Pharmacology, Faculty of Veterinary Medicine, Cairo University, Giza 12211, Egypt

<sup>6</sup> Department of Medical Pharmacology, Medical Faculty, Ataturk University, 25240 Erzurum, Turkey

\* Correspondence: wm0510@126.com (M.W.); 0891syx@163.com (Y.S.)

† These authors contributed equally to this work.

**Table S1 Sequences of Oligonucleotides Used in This Work**

| Oligo                      | Sequence(5'-3')                                                                           |
|----------------------------|-------------------------------------------------------------------------------------------|
| polyA                      | AAAAAAAA-NH <sub>2</sub>                                                                  |
| polyT-Aptamer <sup>1</sup> | TTTTTTTGCTAGACGATATTCGTCCATCCGAGCCCGTGGCGGGCTTTAGGACTCTGCGGGCTTCGCGGCGCTGTCAGACTGAATATGTC |
| complementary DNA          | GACATATTCAGTCTGACAGCGCCGCGAAGCCCGCAGAGTACTAAAGCCCGCCA<br>CGGGCTCGGATGGACGAATATCGTCTAGC    |
| upstream primer            | GCTCGGATGGACGAATATCGTCTAG                                                                 |
| downstream primer          | TATTCGTCCATCCGAGCCCGTGGCG                                                                 |

**Table S2 qPCR conditions**
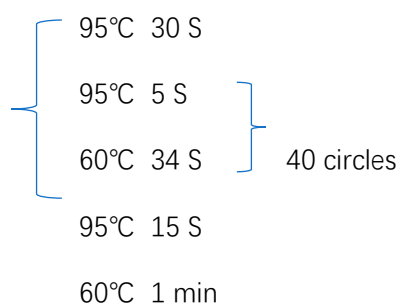

Diagram illustrating the qPCR conditions:

- 95°C 30 S
- 95°C 5 S
- 60°C 34 S
- 95°C 15 S
- 60°C 1 min

The first three conditions (95°C 30 S, 95°C 5 S, and 60°C 34 S) are grouped by a bracket and labeled "40 circles".

**Table S3 Estimation of glyphosate recovery based on this method**

| Sample    | Standard Amount | Addition (ppm) | Recovery Rate(%) |       | RSD(%) |
|-----------|-----------------|----------------|------------------|-------|--------|
| Tap water | 1.4             | 105.4          | 96.1             | 113.1 | 0.58   |
|           | 0.7             | 109            | 96.9             | 104.3 | 0.40   |
|           | 0.35            | 104.9          | 91.5             | 114.4 | 0.73   |

**References**

1. Chen, F.; Li, G.; Liu, H.; Leung, C.-H.; Ma, D.-L., G-quadruplex-based detection of glyphosate in complex biological systems by a time-resolved luminescent assay. *Sensors and Actuators B: Chemical* **2020**, 320.
